# Supplementary material for: LEAFY homeostasis is regulated via ubiquitin-dependent degradation and sequestration in cytoplasmic condensates
Source: PubMed Central journal article supplement — iScience. 2023 May 15;26(6):106880. doi: 10.1016/j.isci.2023.106880 (PMC10227421; doi:10.1016/j.isci.2023.106880), 2023-05-15
Supplement: mmc1.pdf [file mmc1.pdf]

iScience, Volume 26

## **Supplemental information**

### **LEAFY homeostasis is regulated via ubiquitin-dependent degradation and sequestration in cytoplasmic condensates**

**Ulla Dolde, Fernando Muzzopappa, Charlotte Delesalle, Julie Neveu, Fabian Erdel, and Grégory Vert**

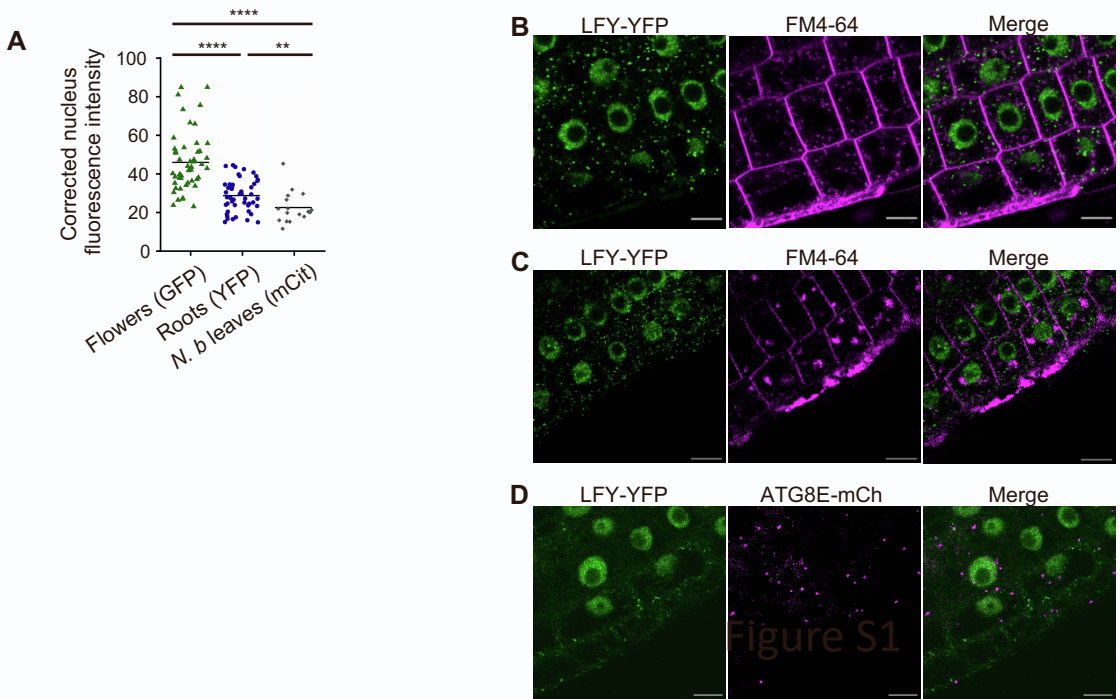

**Supplemental Figure 1** LFY protein localizes to membraneless foci. Related to Figure 1. A, Fluorescence intensity analysis of LFY tagged with fluorescent proteins in flowers from *lfy-12*/LFY::LFY-GFP, in roots from 35S::LFY-YFP and in transiently-expressed 35S::LFY-mCit *N. benthamiana* leaves. Images were taken using similar settings and corrections for molecular brightness of fluorescent proteins applied. n = 18 of 3 independent experiments. Statistical significance was determined using a one-way ANOVA, B, Confocal microscopy images of root tips from 5-day-old 35S::LFY-YFP seedlings stained with FM4-64. Scale bar = 10  $\mu$ m. C, Confocal microscopy images of root tips from 5-day-old 35S::LFY-YFP seedlings treated with BFA and stained with FM4-64. Scale bar = 10  $\mu$ m. D, Confocal microscopy images of root tips from 5-day-old F1 plants resulting from a cross between 35S::LFY-YFP and 35S::ATG8E-mCh plants. Scale bar = 10  $\mu$ m.

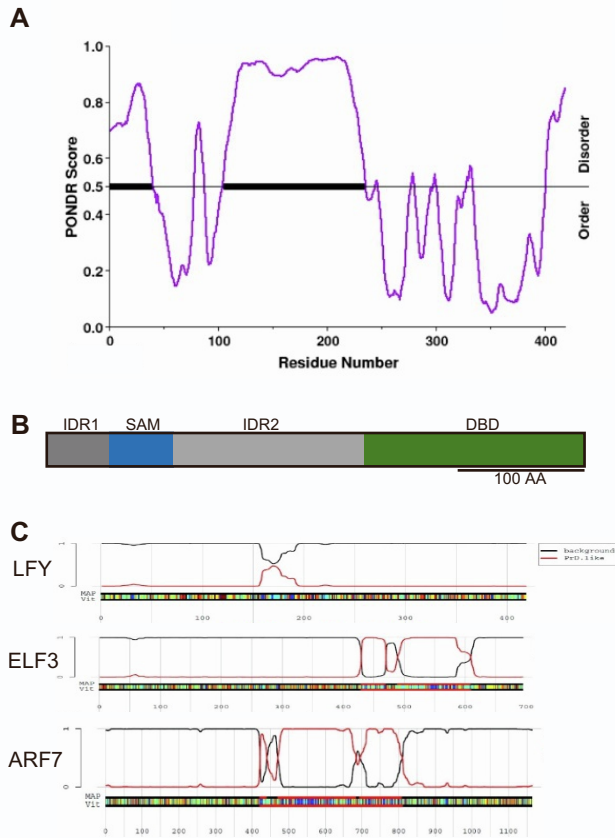

**Supplemental Figure 2** LFY protein contains two IDRs. Related to Figure 2. A, Predictions of intrinsically disordered regions (IDRs) in LFY protein using the Predictor of Natural Disordered Regions (PONDR, <http://www.pondr.com>) algorithm. B, Representation of LFY depicting the IDRs (gray). LFY encodes a sterile alpha motif (SAM) and a DNA-binding domain (DBD). C, Predictions of prion-like domains (PLDs) in LFY protein using the Prion-Like Amino Acid Composition algorithm (PLAAC, <http://plaac.wi.mit.edu>)

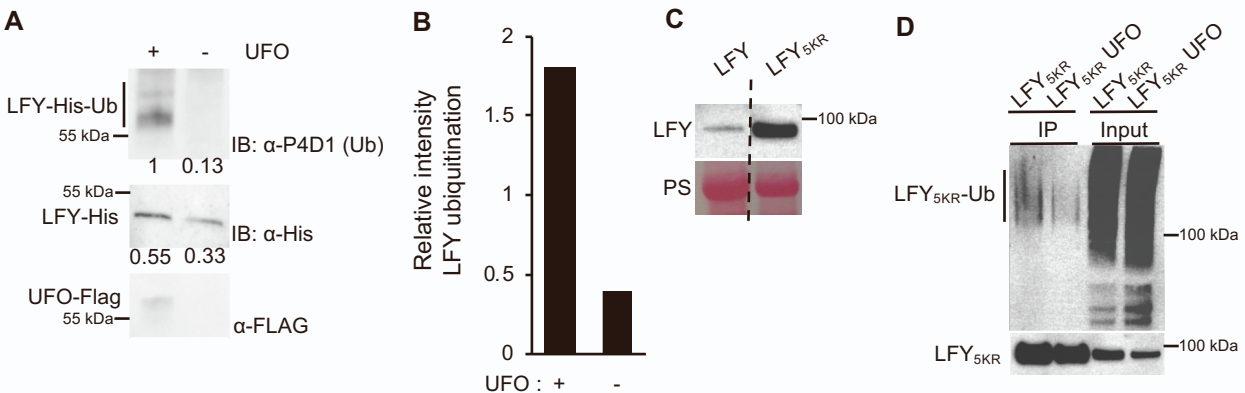

**Supplemental Figure 3** Regulation of LFY levels by UFO-mediated ubiquitination and dependence on lysine residues in IDR. Related to Figure 4. A, *in vitro* ubiquitination assay of LFY-His recombinant protein in the presence or absence of UFO-FLAG. Ubiquitination is detected using anti-ubiquitin antibodies. B, Quantification of the ubiquitination signals shown in (A) relative to LFY-His levels. C, Total LFY protein levels in *N. benthamiana* leaves transiently expressing 35S::LFY-mCit or 35S::LFY<sub>5KR</sub>-mCit. The blot has been cropped to remove unnecessary lanes. The LFY<sub>5KR</sub> lane corresponds to Fig. 5K. Ponceau red staining (PS) serves as loading control. D, Ubiquitination profile of LFY<sub>5KR</sub> protein in *N. benthamiana* leaves transiently expressing 35S::LFY<sub>5KR</sub>-mCit or coexpressing 35S::LFY<sub>5KR</sub>-mCit and 35S::UFO-mCh. LFY<sub>5KR</sub>-mCit proteins were immunoprecipitated using anti-GFP antibodies and ubiquitination profile assessed using anti-ubiquitin antibodies (top panel). Immunodetection using anti-GFP antibodies serves as loading control (bottom panel). The input fractions for LFY-mCit levels were also used to evaluate the impact of UFO expression on LFY<sub>5KR</sub>-mCit accumulation in Fig. 5K.

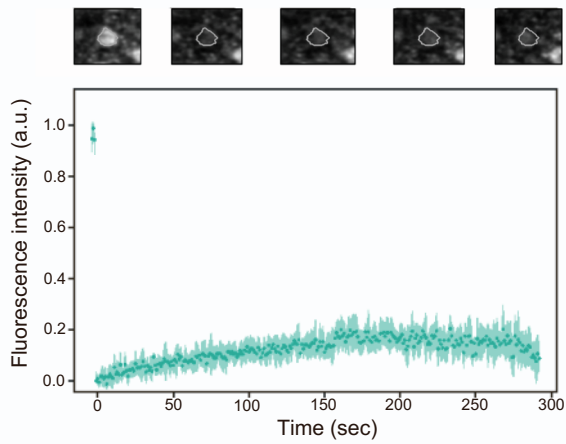

**Supplemental Figure 4** LFY protein nucleocytoplasmic shuttling. Related to Figure 6. FRAP recovery profiles after photobleaching of whole nucleus from 5-day-old 35S::LFY-YFP roots. Top panel: representative nucleus during a FRAP experiment. Bottom panel: recovery profile of LFY-YFP fluorescence over time. n=8, independent experiments.

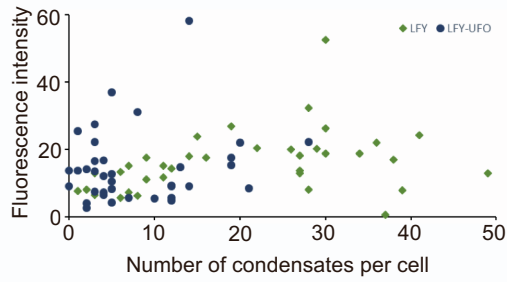

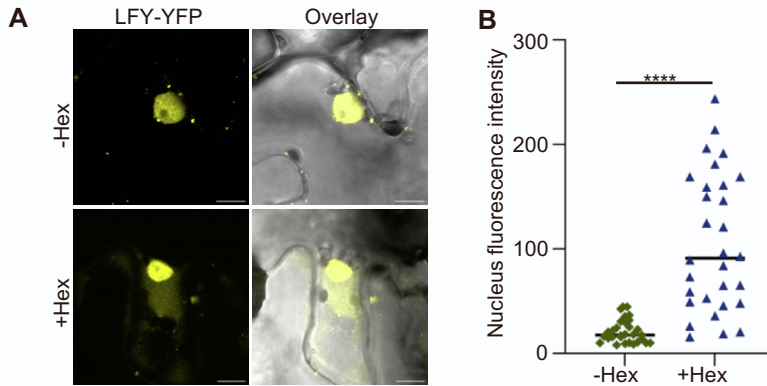

**Supplemental Figure 6** LFY protein forms biomolecular condensates. Related to Figure 7. A, Transient expression of 35S::LFY-mCit in *N. benthamiana* leaves before and after treatment with 20% 1,6-hexanediol. Scale bar = 10  $\mu$ m. B, Quantification of fluorescence intensity in the nucleus of *N. benthamiana* leaves transiently expressing 35S::LFY-YFP before and after treatment with 20% 1,6-hexanediol as shown in (A). n = 30 of 3 independent experiments. Statistical significance was determined using a two-tailed Student's t-test.

**A**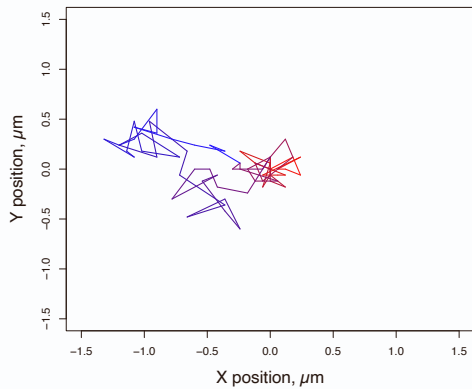**B**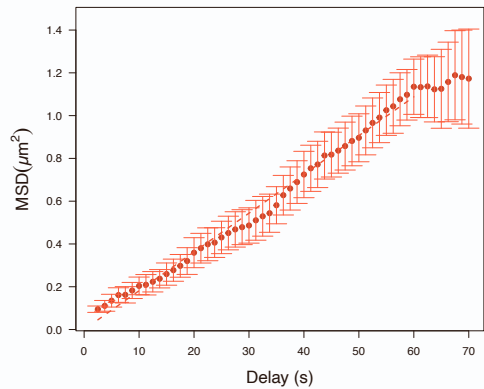

**Supplemental Figure 7** Mean Square Displacement analysis of LFY condensates. Related to Figure 2. A, Single trajectory of a representative cytoplasmic LFY condensate in *A. thaliana* over a period of 80 seconds. B, Mean square Displacement (MSD) values of the trajectory in (A), the linear fit to obtain the diffusion coefficient is shown as a dashed line. The error bars represent the standard deviation.



## Supplemental Table S1. Primers used in this study, Related to STAR Methods.

| Primer names             | Aims                           | Primer sequences (5' → 3')                            |
|--------------------------|--------------------------------|-------------------------------------------------------|
| LFY-attB1                | LFY CDS cloning                | GGGGACAAGTTTGTACAAAAAAGCAGGCTGGATGGATCCTGAAGGTTTCAC   |
| LFY-attB2                | LFY CDS cloning                | GGGGACCACTTTGTACAAGAAAGCTGGGTAGAAACGCAAGTCGTCGCCGC    |
| UFO-attB1                | UFO CDS cloning                | GGGGACAAGTTTGTACAAAAAAGCAGGCTGGATGGATTCAACTGTGTTTCAT  |
| UFO-attB2                | UFO CDS cloning                | GGGGACCACTTTGTACAAGAAAGCTGGGTAACAGACTCCAGGAAATGGAA    |
| ΔFbox -attB1             | ΔFbox CDS cloning              | GGGGACAAGTTTGTACAAAAAAGCAGGCTGGATGCAACTACTTCTCTCCGACA |
| Fbox-attB2               | Fbox CDS cloning               | GGGGACCACTTTGTACAAGAAAGCTGGGTAAGATATGTCTCGAGGAAGGT    |
| LFY <sup>1-3KR</sup> -Fw | LFY <sup>5KR</sup> mutagenesis | GGGACGCAGGTC AAGGAAGGATGAGGAGGCAACAGCAGCAGAGACGG      |
| LFY <sup>1-3KR</sup> -Rv | LFY <sup>5KR</sup> mutagenesis | CCGTCTCTGCTGCTGTTGCCTCCTATCCTTCTTGACCTGCGTCCC         |
| LFY <sup>4-5KR</sup> -Fw | LFY <sup>5KR</sup> mutagenesis | GCAGAGACGGAGAAGGAGACCAATGCTGACGTCAGTGG                |
| LFY <sup>4-5KR</sup> -Rv | LFY <sup>5KR</sup> mutagenesis | CCACTGACGTCAGCATTGGTCTCTCTCTCCGTCCTCTGC               |
| LFY-Fw                   | LFY RT-PCR                     | TCACGCTCTTGATGCTCTCTCC                                |
| LFY-Rv                   | LFY RT-PCR                     | TCTGTCTCTGTCCCCAAACC                                  |
| UFO-Fw                   | UFO RT-PCR                     | ACTTCTCTCCGACACAAC                                    |
| UFO-Rv                   | UFO RT-PCR                     | ACCCAACACTAACCCTCC                                    |
| EF-1α-Fw                 | EF-1α RT-PCR                   | GGTTAAGATGATCCCACCAAGCC                               |
| EF-1α-Rv                 | EF-1α RT-PCR                   | GACAACAACAACAGCAACAGTCTG                              |
| AP3-Fw                   | AP3 RT-PCR                     | GGATAGAGAACCAGACAAAC                                  |
| AP3-Rv                   | AP3 RT-PCR                     | GGTACAGATCTACGATCTCC                                  |
| Actin2-Fw                | Actin2 RT-PCR                  | GCCCAGAAGTCTTGTTCCAG                                  |
| Actin2-Rv                | Actin2 RT-PCR                  | TCATACTCGGCCTTGAGAT                                   |
| ufo-1-Fw                 | Genotyping ufo-1               | AGATGGTTTACGTGCAAGGC                                  |
| ufo-1-Rv                 | Genotyping ufo-1               | GTCGTAGGCTTTTGGGAACG                                  |
